# Supplementary material
Source: Research Square preprint supplement (doi:10.21203/rs.3.rs-8865729/v1)
Supplement: Supplementary file 1 [file 16833840a7d73ef00ed59136.docx]

Appendix:

Health status of oysters in the Paranaguá Estuarine Complex through interactions with pathogenic bacteria, protozoa and annelids

Ana Beatriz Vilas Boas Alvesb

Estela Piresa,b

Ricardo Castro Alvarezb

Luciene Correa Limaa

Maikon Di Domenicoa,b

a- Center for Marine Studies, Federal University of Paraná, Sea Studies Center, Av Beira-Mar, s/n Pontal do Sul, Pontal do Paraná, 83255976, PR, Brazil

b- Postgraduate Program in Coastal and Oceanic Systems (PGSISCO), Federal University of Paraná, Sea Studies Center, Av Beira-Mar, s/n Pontal do Sul, Pontal do Paraná, 83255976, PR, Brazil

Table 1. Table 1. Model selection results for *Perkinsus* sp. infection in the rectum and gills of *Crassostrea* sp. oysters. Best-fitting generalized linear models (GLMs) describing *Perkinsus* sp. infection intensity in the rectum and gills as a function of Bay, shell Length, Culture type, and shell Width. For each candidate model, the table presents the degrees of freedom (df), corrected Akaike Information Criterion (AICc), difference to the best model (ΔAICc), and Akaike weight (AICw). A “+” symbol indicates that the variable was included in the model; parameter signs correspond to the direction of coefficients in the averaged model (positive or negative effect). The Relative Importance (RI) values summarize the probability of each predictor being retained across the full model set, highlighting the strongest contributors to variation in Perkinsus infection.

|  |  | Bay | Length | Culture | Width | df | AICc | Delta | AICw |
| --- | --- | --- | --- | --- | --- | --- | --- | --- | --- |
| *Perkinsus* rectum | 13 |  |  | + | -0,506 | 4 | 1515,4 | 0,00 | 0,583 |
|  | 15 |  | 0,059 | + | -0,499 | 5 | 1516,1 | 0,67 | 0,416 |
| RI |  | <0,01 | 0,42 | **1,00** | **1,00** |  |  |  |  |

|  |  | Bay | Length | Culture | Width | df | AICc | Delta | AICw |
| --- | --- | --- | --- | --- | --- | --- | --- | --- | --- |
| *Perkinsus* gills | 8 | + | -0,129 | + |  | 5 | 761,8 | 0,00 | 0,748 |
|  | 16 | + | -0,129 | + | -0,013 | 6 | 764,0 | 2,17 | 0,252 |
| RI |  | **1,00** | **1,00** | **1,00** | 0,25 |  |  |  |  |

Table 2. Taxonomic list of annelid species associated with Crassostrea sp. oysters. Classification of annelid taxa recorded in the study, organized by the two major clades—Errantia and Sedentaria. The table lists each species identification alongside its respective family. Errantia includes predominantly mobile polychaetes (e.g., Nereididae, Phyllodocidae, Syllidae), whereas Sedentaria comprises tube-building and burrowing forms (e.g., Spionidae, Sabellidae, Serpulidae) commonly observed as oyster epibionts or shell borers.

| **Errantia** | **Família** |
| --- | --- |
| *Alitta* sp. | Nereididae |
| *Perinereis vancaurica* (Ehlers,1868) | Nereididae |
| *Nereis oligohalina*(Rioja,1946 ) | Nereididae |
| *Eumida* sp. | Phyllodocidae |
| *Syllidae* sp. | Syllidae |
|  |  |
| **Sedentaria** | **Família** |
| *Polydora* sp. | Spionidae |
| *Nicolea* sp. | Terebelidae |
| *Parasabella* sp. | Sabellidae |
| *Nainereis* sp. | Orbinidae |
| *Hydroides dianthus* | Serpulidae |
| *Branchioma* sp. | Sabellidae |


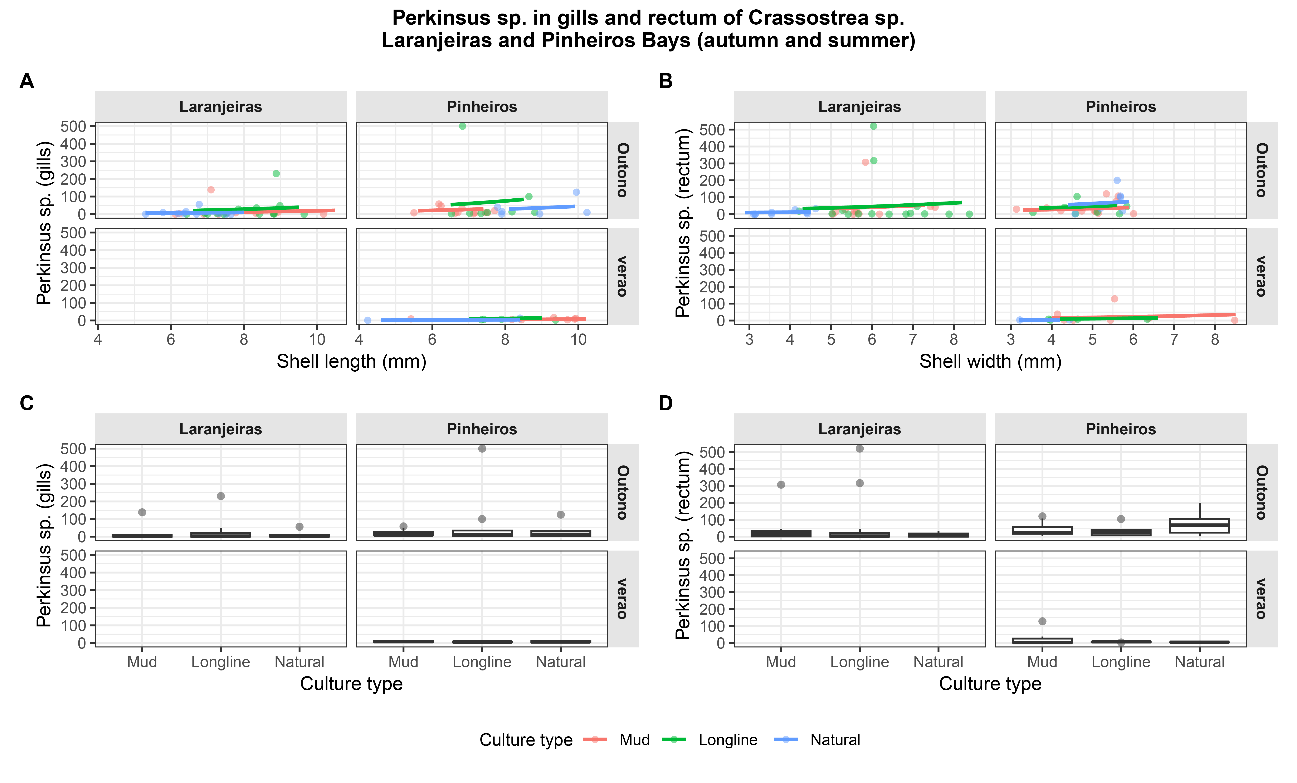


Figure 1. *Perkinsus* sp. infection in gills and rectum of *Crassostrea* sp. from Laranjeiras and Pinheiros Bays (autumn and summer). (A) Generalized linear model (negative binomial) showing the relationship between Perkinsus sp. counts in the gills and oyster shell length (mm), separated by bay and season. (B) Equivalent regression for Perkinsus sp. counts in the rectum as a function of shell width (mm). (C) Boxplots of Perkinsus sp. in the gills across culture types (Mud, Longline, Natural), showing differences between bays and seasons. (D) Boxplots of Perkinsus sp. in the rectum across culture types. Colors indicate culture method (red = Mud, green = Longline, blue = Natural). Panels illustrate seasonal patterns (autumn vs. summer) and spatial variation (Laranjeiras vs. Pinheiros), highlighting the influence of morphology and culture practice on Perkinsus infection intensity.


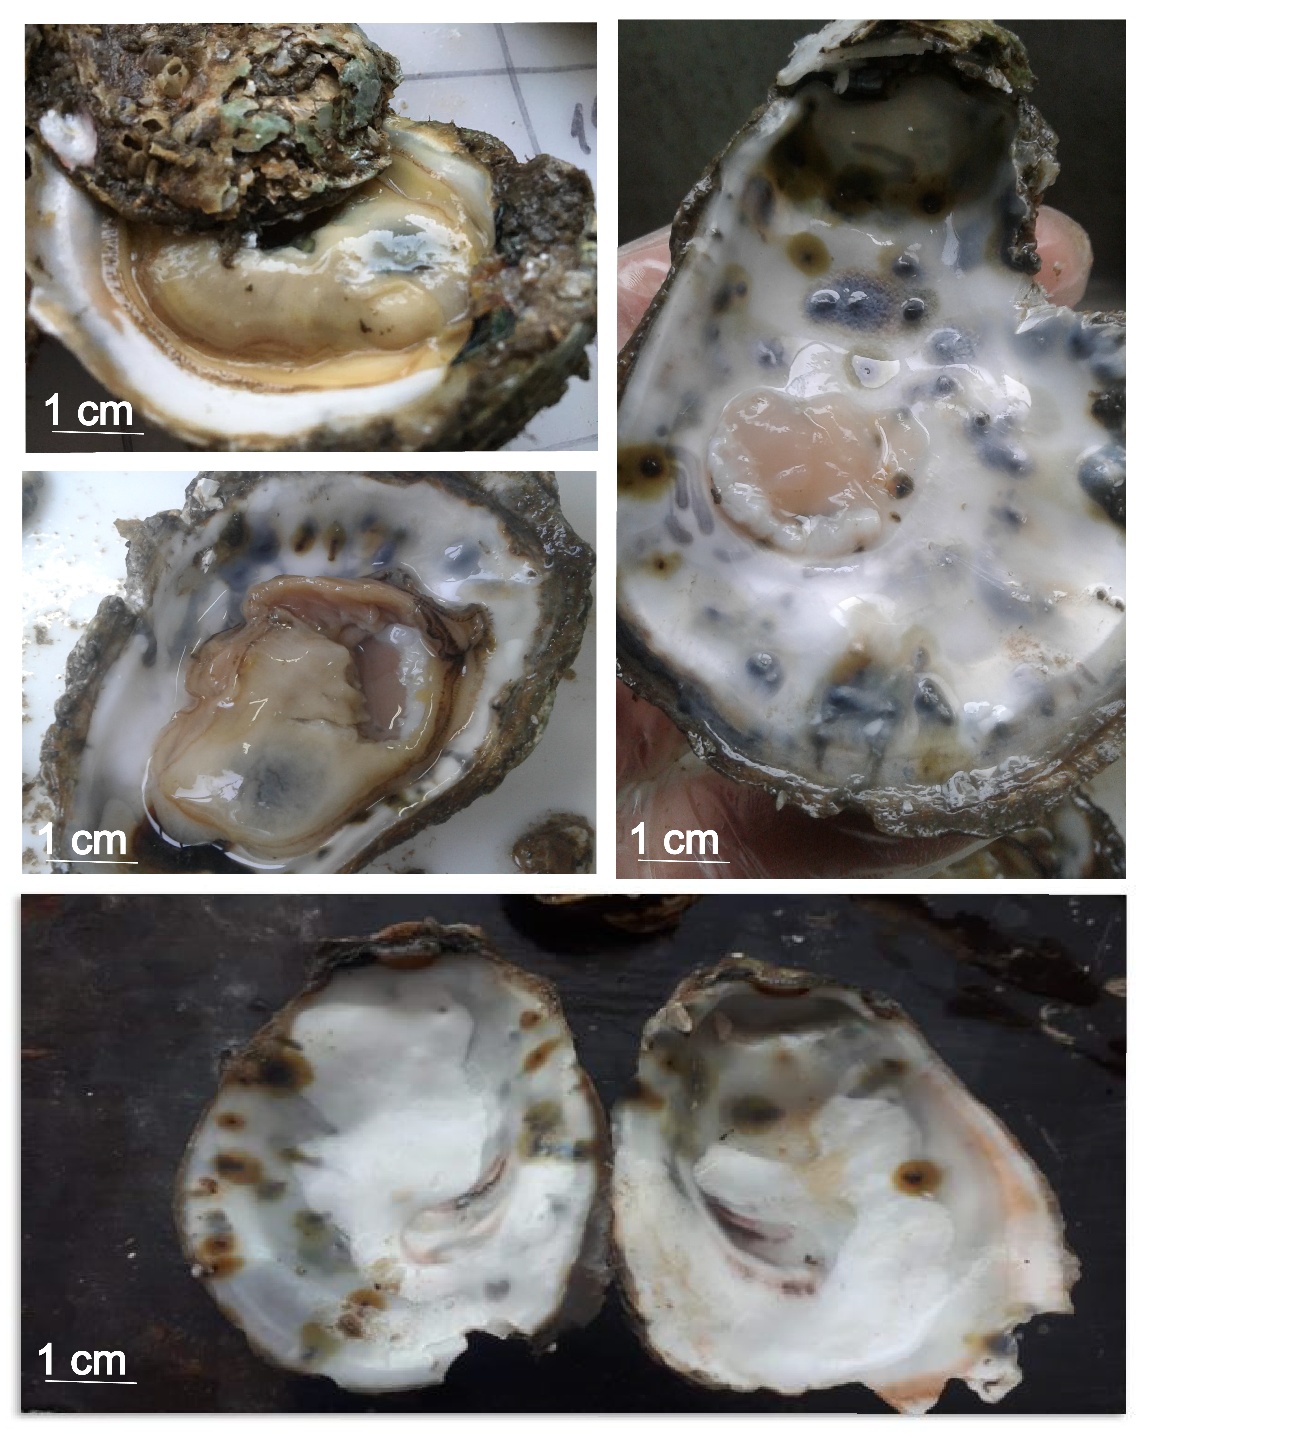


Figure 2. Signs of boring shells and mud blisters formed by the action of polydorid worms
